# Supplementary material
Source: PubMed Central journal article supplement (PMC4600606)

## Supplementary Information

### Treating brain tumor with microbeam radiation generated by a compact carbon-nanotube-based irradiator: initial radiation efficacy study

Hong Yuan<sup>1,2,\*</sup>, Lei Zhang<sup>3</sup>, Jonathan E. Frank<sup>2</sup>, Christina R Inscoe<sup>3,4</sup>, Laurel M Burk<sup>4</sup>, Mike Hadsell<sup>4</sup>, Yueh Z. Lee<sup>1,2,4,5,7</sup>, Jianping Lu<sup>3,4</sup>, Sha Chang<sup>4,5,6,7</sup>, Otto Zhou<sup>3,4,7</sup>

<sup>1</sup>Department of Radiology, <sup>2</sup>Biomedical Imaging Research Center, <sup>3</sup>Department of Applied Physical Sciences, <sup>4</sup>Department of Physics and Astronomy, <sup>5</sup>Department of Biomedical Engineering, <sup>6</sup>Department of Radiation Oncology, <sup>7</sup>Lineberger Comprehensive Cancer Center, University of North Carolina at Chapel Hill, Chapel Hill, NC 27599, USA

#### *Supplementary Results:*

##### 1. Apoptosis in normal brain tissue after microbeam radiation

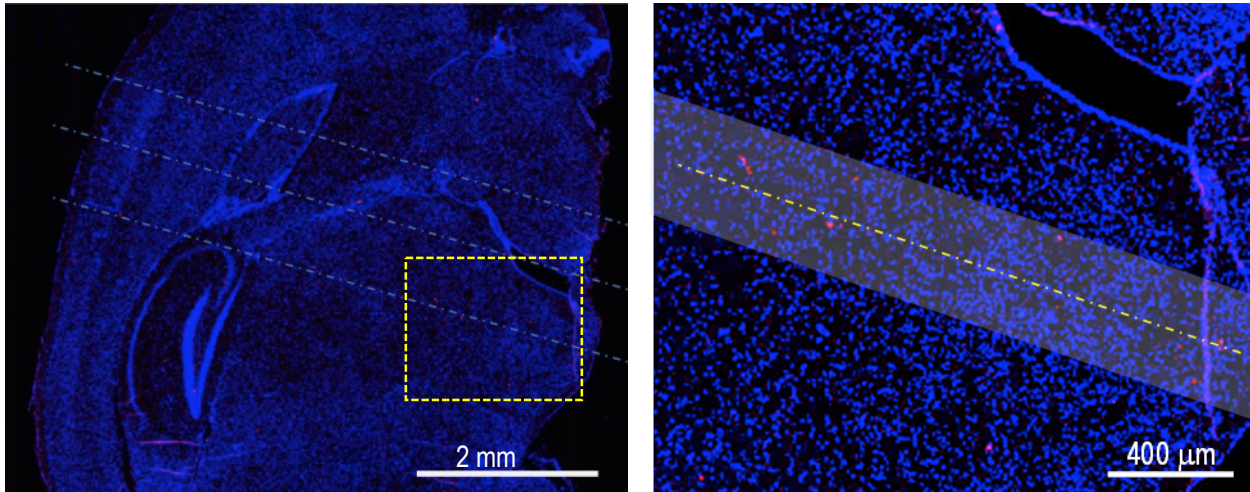

2. Proliferation in normal brain tissue after microbeam radiation:

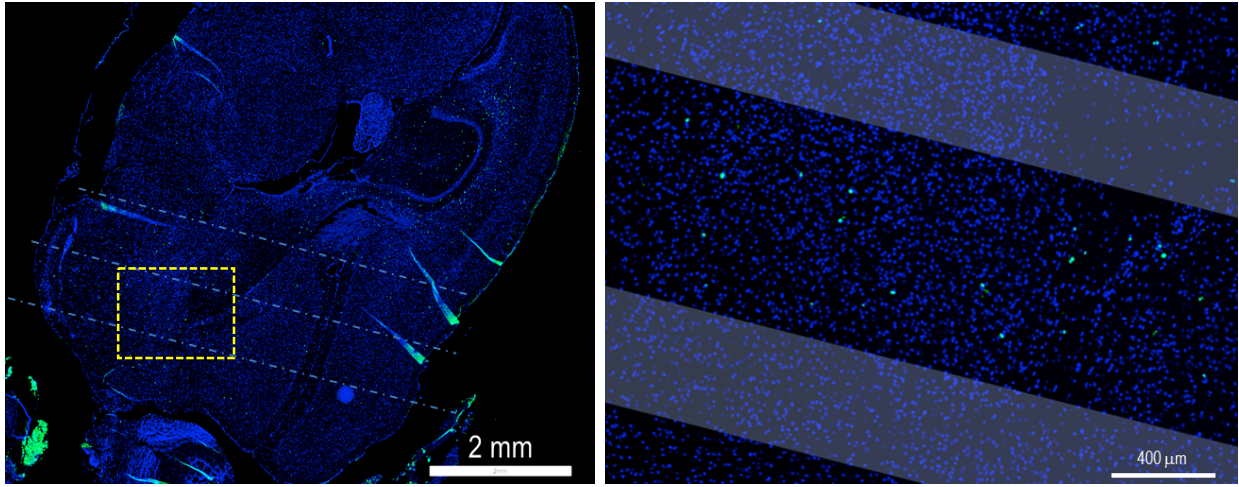

Supplement: NIHMS722112-supplement-supplemental_file_1.pdf [file NIHMS722112-supplement-supplemental_file_1.pdf]
